# Supplementary material for: Fine Mapping, Candidate Gene Identification and Co-segregating Marker Development for the Phytophthora Root Rot Resistance Gene RpsYD25
Source: Front Genet. 2020 Jul 28;11:799. doi: 10.3389/fgene.2020.00799 (PMC7399351; doi:10.3389/fgene.2020.00799)
Supplement: Supplementary file 5 [file Data_Sheet_1.docx]

Supplementary Material

Fine mapping, candidate gene identification and co-segregating marker development for the Phytophthora root rot resistance gene *RpsYD25* in soybean

Chao Zhong1, 2, Suli Sun1, Canxing Duan1, and Zhendong Zhu1

1National Key Facility for Crop Gene Resources and Genetic Improvement, Institute of Crop Sciences, Chinese Academy of Agricultural Sciences, Beijing, 100081, China

2College of Agronomy, Shenyang Agricultural University, Shenyang, China

***Corresponding author:** Zhendong Zhu

E-mail: zhuzhendong@caas.cn

Tel.: +86-10-82109609; Fax: +86-10-82109608

# Supplementary Tables

**
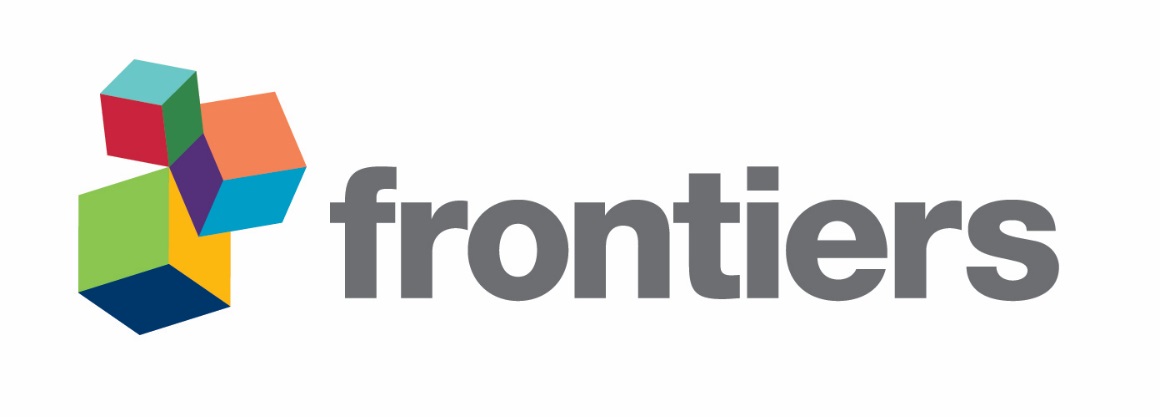
**

**Table S1** Primers for SNPs based on Tetra-AMRS PCR

**Table S2** InDels used for developing PCR markers

**Table S3** SSR marker primer sequences searched and developed based on reference genome

**Table S4** Reaction types of 178 soybean genotypes after inoculation with 8 *P. sojea* isolates

**Figure S1** Schematic representation of the construction of derived F3:4 population.

**Figure S2** Frequency distribution of proportion of dead individuals in mapping populations. **(A)** Frequency distribution of proportion of dead individuals in F2:3 families inoculated with *P. sojae* isolate PsMC1. **(B)** Frequency distribution of proportion of dead individuals in F2:3 families inoculated with *P. sojae* isolate Ps7063. **(C)** Frequency distribution of proportion of dead individuals in F3:4 families inoculated with *P. sojae* isolate PsMC1.
